# Supplementary material for: Effect of N-acetyl-cysteine in prevention of noise-induced hearing loss: a systematic review and meta-analysis of randomized controlled trials
Source: PubMed Central journal article supplement — Arch Med Sci. 2021 Mar 21;18(6):1535–41. doi: 10.5114/aoms/109126 (PMC9710288; doi:10.5114/aoms/109126), 2021-03-21
Supplement: AMS-18-6-109126-s1.pdf [file AMS-18-6-109126-s1.pdf]

Supplementary Table SI. Database and search strategy

| Database       | Syntax                                                                                                                                                                                                                                                                                                                                                                                                                                                                                                                                                                                                                                                                                                                                                                                                                                                                                                                                                                                                                                                                                                                                                                                                                                                                                                                                                                                                                                                                                                                                                                                                                                                                                                                                                                                                                                                                                                                                                                                                                                                                                                                                                                                                                                                                                                                                                                                                                                                                                                                                                                                                                                                                                                                                                                                                                                                                                                                                                                                                                                                                                                                                                 | Returns |
|----------------|--------------------------------------------------------------------------------------------------------------------------------------------------------------------------------------------------------------------------------------------------------------------------------------------------------------------------------------------------------------------------------------------------------------------------------------------------------------------------------------------------------------------------------------------------------------------------------------------------------------------------------------------------------------------------------------------------------------------------------------------------------------------------------------------------------------------------------------------------------------------------------------------------------------------------------------------------------------------------------------------------------------------------------------------------------------------------------------------------------------------------------------------------------------------------------------------------------------------------------------------------------------------------------------------------------------------------------------------------------------------------------------------------------------------------------------------------------------------------------------------------------------------------------------------------------------------------------------------------------------------------------------------------------------------------------------------------------------------------------------------------------------------------------------------------------------------------------------------------------------------------------------------------------------------------------------------------------------------------------------------------------------------------------------------------------------------------------------------------------------------------------------------------------------------------------------------------------------------------------------------------------------------------------------------------------------------------------------------------------------------------------------------------------------------------------------------------------------------------------------------------------------------------------------------------------------------------------------------------------------------------------------------------------------------------------------------------------------------------------------------------------------------------------------------------------------------------------------------------------------------------------------------------------------------------------------------------------------------------------------------------------------------------------------------------------------------------------------------------------------------------------------------------------|---------|
| Cochrane       | (noise induced hearing loss OR NIHL OR music induced hearing loss OR music induced deaf OR music induced deafness OR noise induced deafness OR sound induced hearing loss OR sound induced deaf OR sound induced deafness) and (N-acetyl-cysteine OR acetylcysteine OR acetyl cysteine OR Acetin OR Actein OR NAC)                                                                                                                                                                                                                                                                                                                                                                                                                                                                                                                                                                                                                                                                                                                                                                                                                                                                                                                                                                                                                                                                                                                                                                                                                                                                                                                                                                                                                                                                                                                                                                                                                                                                                                                                                                                                                                                                                                                                                                                                                                                                                                                                                                                                                                                                                                                                                                                                                                                                                                                                                                                                                                                                                                                                                                                                                                     | 12      |
| Embase         | 'noise induced hearing loss'/exp OR 'noise induced hearing loss' OR 'hearing loss'/exp OR 'hearing loss' OR 'hearing damage'/exp OR 'hearing damage' OR 'deaf'/exp OR deaf OR 'deafness'/exp OR deafness AND ('noise induced' OR 'sound induced' OR 'music induced') AND ('acerac'/exp OR 'acerac' OR 'acetadote'/exp OR 'acetadote' OR 'acetain'/exp OR 'acetain' OR 'acetyl cysteine'/exp OR 'acetyl cysteine' OR 'acetyl l cysteine'/exp OR 'acetyl l cysteine' OR 'acetylcysteine'/exp OR 'acetylcysteine' OR 'acypront'/exp OR 'acypront' OR 'acys-5'/exp OR 'acys-5' OR 'airbron'/exp OR 'airbron' OR 'alveolex'/exp OR 'alveolex' OR 'bromuc'/exp OR 'bromuc' OR 'brunac'/exp OR 'brunac' OR 'cetilan'/exp OR 'cetilan' OR 'cetylev'/exp OR 'cetylev' OR 'drenafen'/exp OR 'drenafen' OR 'ecomucyl'/exp OR 'ecomucyl' OR 'encore (drug)'/exp OR 'encore (drug)' OR 'exomuc'/exp OR 'exomuc' OR 'fabrol'/exp OR 'fabrol' OR 'flemex-ac'/exp OR 'flemex-ac' OR 'fluimicil'/exp OR 'fluimicil' OR 'fluimucil'/exp OR 'fluimucil' OR 'fluimucil a'/exp OR 'fluimucil a' OR 'fluimukan'/exp OR 'fluimukan' OR 'fluprowit'/exp OR 'fluprowit' OR 'flutafin'/exp OR 'flutafin' OR 'hidonac'/exp OR 'hidonac' OR 'inspir'/exp OR 'inspir' OR 'l alpha acetamido beta mercaptopropionic acid'/exp OR 'l alpha acetamido beta mercaptopropionic acid' OR 'lappe'/exp OR 'lappe' OR 'libramucil'/exp OR 'libramucil' OR 'm.c.t. '/exp OR 'm.c.t.' OR 'menaxol'/exp OR 'menaxol' OR 'mercaptopuric acid'/exp OR 'mercaptopuric acid' OR 'mucocil'/exp OR 'mucocil' OR 'mucofillin'/exp OR 'mucofillin' OR 'mucolator'/exp OR 'mucolator' OR 'mucolyticum lappe'/exp OR 'mucolyticum lappe' OR 'mucomiste'/exp OR 'mucomiste' OR 'mucomyst'/exp OR 'mucomyst' OR 'mucomyst-10'/exp OR 'mucomyst-10' OR 'mucomyst-20'/exp OR 'mucomyst-20' OR 'mucopect'/exp OR 'mucopect' OR 'mucoserin'/exp OR 'mucoserin' OR 'mucosil'/exp OR 'mucosil' OR 'mucosil-10'/exp OR 'mucosil-10' OR 'mucosil-20'/exp OR 'mucosil-20' OR 'mucosof'/exp OR 'mucosof' OR 'mucosol-10'/exp OR 'mucosol-10' OR 'mucosolvin'/exp OR 'mucosolvin' OR 'mucosten'/exp OR 'mucosten' OR 'mucoza'/exp OR 'mucoza' OR 'mukolit'/exp OR 'mukolit' OR 'muteran'/exp OR 'muteran' OR 'n acetyl 3 mercaptoalanine'/exp OR 'n acetyl 3 mercaptoalanine' OR 'n acetyl cystein'/exp OR 'n acetyl cystein' OR 'n acetyl cysteine'/exp OR 'n acetyl cysteine' OR 'n acetyl l cysteine'/exp OR 'n acetyl l cysteine' OR 'n acetylcystein'/exp OR 'n acetylcystein' OR 'n acetylcysteine'/exp OR 'n acetylcysteine' OR 'n alpha acetylcysteine'/exp OR 'n alpha acetylcysteine' OR 'nsc 111180'/exp OR 'nsc 111180' OR 'parvolex'/exp OR 'parvolex' OR 'parvolex dbl'/exp OR 'parvolex dbl' OR 'reolin'/exp OR 'reolin' OR 'respaire'/exp OR 'respaire' OR 'sigamucil'/exp OR 'sigamucil' OR 'sigamucil low'/exp OR 'sigamucil low' OR 'siran 200'/exp OR 'siran 200' OR 'solmucol'/exp OR 'solmucol' OR 'spatam'/exp OR 'spatam' OR 'sputoprompt'/exp OR 'sputoprompt' OR 'stecin'/exp OR 'stecin' OR 'tixair'/exp OR 'tixair' OR 'zifluvis'/exp OR 'zifluvis' OR acetin OR 'actein'/exp OR 'actein') | 62      |
| PubMed         | ((((((((((noise induced hearing loss) OR NIHL) OR music induced hearing loss) OR music induced deaf) OR music induced deafness) OR noise induced deafness) OR sound induced hearing loss) OR sound induced deaf) OR sound induced deafness)) AND ((((((N-acetyl-cysteine) OR acetylcysteine) OR acetyl cysteine) OR Acetin) OR Actein) OR NAC)                                                                                                                                                                                                                                                                                                                                                                                                                                                                                                                                                                                                                                                                                                                                                                                                                                                                                                                                                                                                                                                                                                                                                                                                                                                                                                                                                                                                                                                                                                                                                                                                                                                                                                                                                                                                                                                                                                                                                                                                                                                                                                                                                                                                                                                                                                                                                                                                                                                                                                                                                                                                                                                                                                                                                                                                         | 51      |
| Science Direct | ((((((((((noise induced hearing loss) OR NIHL) OR music induced hearing loss) OR music induced deaf) OR music induced deafness) OR noise induced deafness) OR sound induced hearing loss) OR sound induced deaf) OR sound induced deafness))) and ((((((N-acetyl-cysteine) OR acetylcysteine) OR acetyl cysteine) OR Acetin) OR Actein) OR NAC))                                                                                                                                                                                                                                                                                                                                                                                                                                                                                                                                                                                                                                                                                                                                                                                                                                                                                                                                                                                                                                                                                                                                                                                                                                                                                                                                                                                                                                                                                                                                                                                                                                                                                                                                                                                                                                                                                                                                                                                                                                                                                                                                                                                                                                                                                                                                                                                                                                                                                                                                                                                                                                                                                                                                                                                                       | 172     |
| Scopus         | (noise induced hearing loss OR NIHL OR music induced hearing loss OR music induced deaf OR music induced deafness OR noise induced deafness OR sound induced hearing loss OR sound induced deaf OR sound induced deafness) and (N-acetyl-cysteine OR acetylcysteine OR acetyl cysteine OR Acetin OR Actein OR NAC)                                                                                                                                                                                                                                                                                                                                                                                                                                                                                                                                                                                                                                                                                                                                                                                                                                                                                                                                                                                                                                                                                                                                                                                                                                                                                                                                                                                                                                                                                                                                                                                                                                                                                                                                                                                                                                                                                                                                                                                                                                                                                                                                                                                                                                                                                                                                                                                                                                                                                                                                                                                                                                                                                                                                                                                                                                     | 53      |
| Web of Science | TOPIC: (((((((((((noise induced hearing loss) OR NIHL) OR music induced hearing loss) OR music induced deaf) OR music induced deafness) OR noise induced deafness) OR sound induced hearing loss) OR sound induced deaf) OR sound induced deafness)))) AND TOPIC: (((((((((((N-acetyl-cysteine) OR acetylcysteine) OR acetyl cysteine) OR Acetin) OR Actein) OR NAC))))<br>Timespan: All years. Indexes: SCI-EXPANDED, SSCI.                                                                                                                                                                                                                                                                                                                                                                                                                                                                                                                                                                                                                                                                                                                                                                                                                                                                                                                                                                                                                                                                                                                                                                                                                                                                                                                                                                                                                                                                                                                                                                                                                                                                                                                                                                                                                                                                                                                                                                                                                                                                                                                                                                                                                                                                                                                                                                                                                                                                                                                                                                                                                                                                                                                           | 71      |
